# Supplementary material for: Synthesis, crystal structure and physical properties of FeV4S8and KFe2V8S16
Source: Royal Society of Chemistry journal article supplement (doi:10.1039/c5ra22619h), 2016-01-01
Supplement: c5ra22619h1.pdf [file c5ra22619h1.pdf]

## Supporting Information

### Synthesis, Crystal Structure and Physical Properties of $\text{FeV}_4\text{S}_8$ and $\text{KFe}_2\text{V}_8\text{S}_{16}$

Lifang Sui,<sup>a,b</sup> Xian Zhang,<sup>c</sup> Zhangliu Tian,<sup>b</sup> Rongtie Huang,<sup>a,b</sup> Hui Zhang<sup>\*b</sup>, Jinjong Cheng,<sup>a</sup>  
Fuqiang Huang<sup>\*b,c</sup>

<sup>a</sup> Department of Material Sciences and Engineering, Shanghai University, Shanghai 200444, P.R. China

<sup>b</sup> CAS Key Laboratory of Materials for Energy Conversion and State Key Laboratory of High Performance Ceramics and Superfine Microstructures, Shanghai Institute of Ceramics, Chinese Academy of Sciences, Shanghai 200050, P. R. China. E-mail: huangfq@mail.sic.ac.cn.

<sup>c</sup> Beijing National Laboratory for Molecular Sciences, College of Chemistry and Molecular Engineering, Peking University, Beijing 100871, P. R. China.

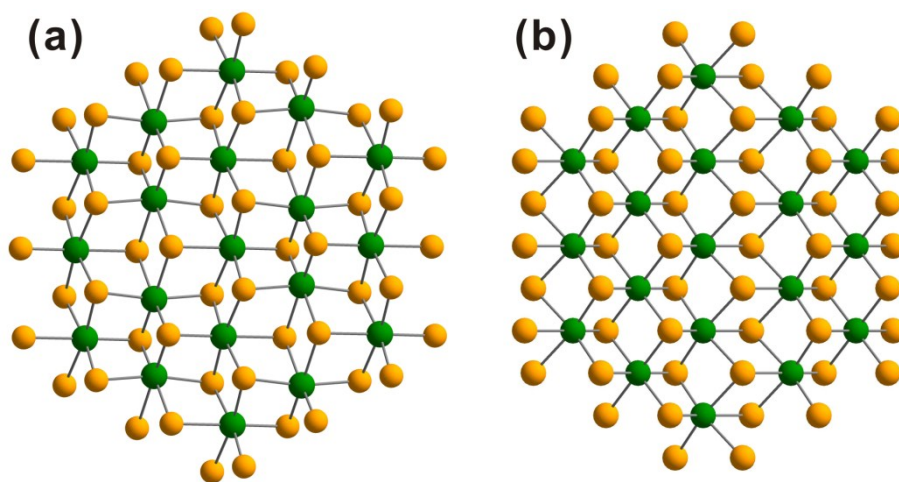

**Figure S1.** (a) The structure of the  $[\text{V}_4\text{S}_8]^{3-}$  layers in  $\text{FeV}_4\text{S}_8$ . (b) The structure of the  $[\text{V}_8\text{S}_{16}]^{7-}$  layers  $\text{KFe}_2\text{V}_8\text{S}_{16}$ .

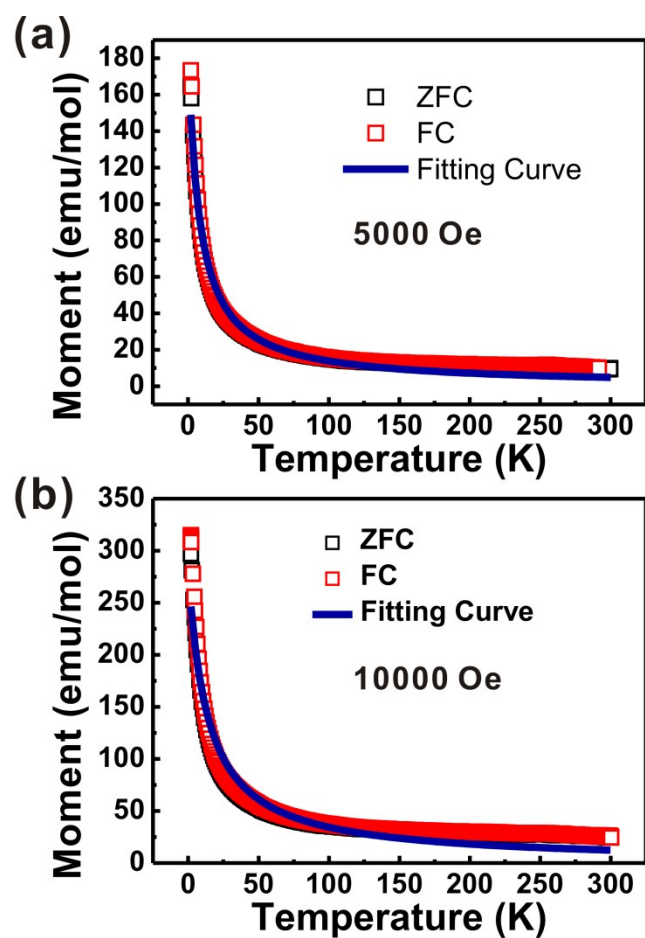

**Figure S2.** Temperature-dependence of the magnetization of the  $\text{FeV}_4\text{S}_8$  compound under different external magnetic field (a) 5000 Oe and (b) 10000 Oe.

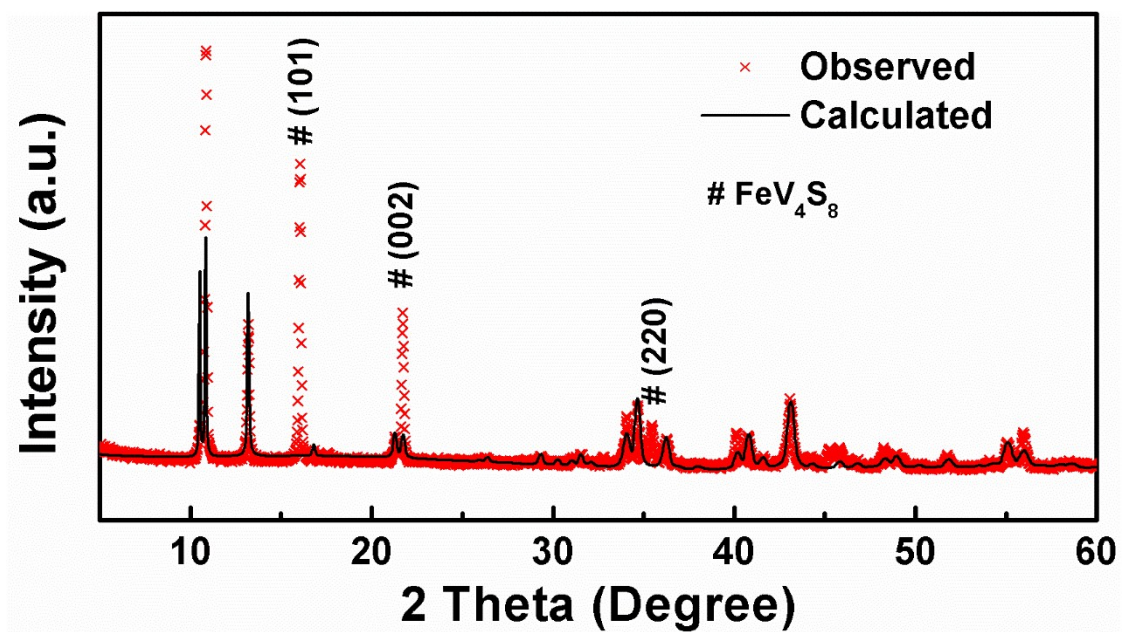

Figure S3. Powder XRD of the as-synthesized  $\text{KFe}_2\text{V}_8\text{S}_{16}$
